# Supplementary material
Source: ML conference proceedings conference paper supplement (https://openaccess.thecvf.com/content/ICCV2021/html/Ramanathan_PreDet_Large-Scale_Weakly_ICCV_2021_paper.html)
Supplement: Supplementary file 1 [file Ramanathan_PreDet_Large-Scale_Weakly_ICCV_2021_supplemental.pdf]

# PreDet: Large-scale weakly supervised pre-training for detection

Vignesh Ramanathan  
Facebook AI  
vigneshr@fb.com

Rui Wang  
Facebook AI  
ruiw@fb.com

Dhruv Mahajan  
Facebook AI  
dhruvm@fb.com

## 1. Learning rate parameters

**ResNext-101-32x8d + FPN:** For all models, including PreDet, InfoMin, SEER, from-scratch and classification pre-trained, models we conducted a grid-search to identify the best learning-rate and gamma values for each model. Additionally, we also did a grid-search to identify the best scaling factor by which learning rate for the mask-head parameters should be scaled for each of the models, when training a mask-RCNN model. The learning rate,  $\gamma$  and scaling factor ( $lr_{mf}$ ) were searched in the following sets respectively: (0.005, 0.01, 0.02, 0.03, 0.04), (0.1, 0.15, 0.2) and (1.0, 4.0). The best learning rate parameters for different models are shown in Tab. 1:

| pre-training     | dataset | model     | lr      | $\gamma$  | $lr_{mf}$ |      |     |
|------------------|---------|-----------|---------|-----------|-----------|------|-----|
| from-scratch     | COCO    | mask-RCNN | 0.02    | 0.1       | 4.0       |      |     |
| cls-Imagenet     |         |           | 0.02    | 0.1       | 1.0       |      |     |
| cls-IG50M        |         |           | 0.01    | 0.15      | 1.0       |      |     |
| SEER-1B          |         |           | 0.02    | 0.1       | 4.0       |      |     |
| Infomin          |         |           | 0.02    | 0.1       | 4.0       |      |     |
| PreDet -ImageNet |         |           | 0.02    | 0.1       | 4.0       |      |     |
| PreDet -IG50M    |         |           | 0.01    | 0.1       | 4.0       |      |     |
| from-scratch     |         |           | LVIS-v1 | mask-RCNN | 0.02      | 0.1  | 4.0 |
| cls-Imagenet     |         |           |         |           | 0.02      | 0.1  | 1.0 |
| cls-IG50M        |         |           |         |           | 0.01      | 0.15 | 1.0 |
| SEER-1B          | 0.02    | 0.1       |         |           | 4.0       |      |     |
| Infomin          | 0.02    | 0.1       |         |           | 4.0       |      |     |
| PreDet -ImageNet | 0.02    | 0.1       |         |           | 4.0       |      |     |
| PreDet -IG50M    | 0.005   | 0.2       |         |           | 4.0       |      |     |
| from-scratch     | COCO    | Retinanet |         |           | 0.02      | 0.1  | -   |
| cls-Imagenet     |         |           |         |           | 0.01      | 0.1  | -   |
| cls-IG50M        |         |           |         |           | 0.01      | 0.1  | -   |
| SEER-1B          |         |           | 0.01    | 0.1       | -         |      |     |
| Infomin          |         |           | 0.01    | 0.1       | -         |      |     |
| PreDet -ImageNet |         |           | 0.01    | 0.1       | -         |      |     |
| PreDet -IG50M    |         |           | 0.01    | 0.1       | -         |      |     |

Table 1. Learning rate parameters used for fine-tuning Resnext-101-32x8d+FPN pre-trained with different methods, for different models and datasets.

**R50 + FPN for mask-RCNN :** For PreDet -IG50M model, we used  $lr, \gamma$  values of 0.01, 0.15 and did not scale the learning rate for the mask-head parameters.

**ResNext-101-32x8d + FPN for mask-RCNN on smaller target datasets:** When training on smaller subsets of COCO datasets, we did a grid-search to identify best

learning rate and  $\gamma$  from the following sets respectively: (0.04, 0.03, 0.02) and (0.02, 0.05, 0.1). We also tried different overall fine-tuning iterations such as 60k, 70k, 130k iterations in addition to standard  $1\times, 2\times$  schedules. We dropped the learning rate by  $\gamma$  twice at the following iterations for these 3 new schedules: for 60k iterations, dropped  $lr$  at (40k, 55k) iterations, for 70k iterations, dropped  $lr$  at (50k, 65k) iteration and for 130k iterations, dropped  $lr$  at (100k, 120k) iterations. The best learning rate schedules for the different target dataset-sizes are shown below in Tab. 2.

| pre-training | dataset-size | train schedule | lr   | $\gamma$ |
|--------------|--------------|----------------|------|----------|
| from-scratch | 35k          | 540k           | 0.04 | 0.02     |
| cls-Imagenet |              | 90k            | 0.04 | 0.02     |
| PreDet       |              | 90k            | 0.04 | 0.02     |
| from-scratch | 10k          | 90k            | 0.04 | 0.02     |
| cls-Imagenet |              | 60k            | 0.03 | 0.02     |
| PreDet       |              | 60k            | 0.02 | 0.1      |
| from-scratch | 5k           | 80k            | 0.02 | 0.1      |
| cls-Imagenet |              | 60k            | 0.02 | 0.1      |
| PreDet       |              | 60k            | 0.02 | 0.1      |
| from-scratch | 1k           | 60k            | 0.02 | 0.1      |
| cls-Imagenet |              | 60k            | 0.02 | 0.1      |
| PreDet       |              | 60k            | 0.02 | 0.1      |

Table 2. Learning rate parameters and fine-tuning used for target datasets of different sizes.

**Regnet64 + FPN for mask-RCNN :** We use  $lr$  of 0.01 and  $\gamma$  of 0.1 for PreDet. We use  $lr$  of 0.02 and  $\gamma$  of 0.1 for Imagenet pre-trained and SEER-IG1B models. As per SEER, we use a weight decay of  $5e^{-5}$  for both pre-training and fine-tuning.

## 2. Detailed ResNext-101-32x8d + FPN results

We show detailed results including  $AP_{75}^{box}, AP_{50}^{box}, AP_{75}^{mask}, AP_{50}^{mask}$  for ResNext-101-32x8d+FPN model for COCO and LVIS-v1 datasets below (corresponding to Fig.5, Fig.6 in main draft) in Tab. 3 and Tab. 4 respectively.

## 3. Details of CRPN

The query score generation and bounding box regression parts of the CRPN are run in parallel for all  $Q$  input queries. We visualize these components in detail in Fig. 1. Note

| pre-training     | sched. | mask-RCNN   |                  |                  |             |                  |                  | RetinaNet   |                  |                  |
|------------------|--------|-------------|------------------|------------------|-------------|------------------|------------------|-------------|------------------|------------------|
|                  |        | $AP^{bbox}$ | $AP_{50}^{bbox}$ | $AP_{75}^{bbox}$ | $AP^{mask}$ | $AP_{50}^{mask}$ | $AP_{75}^{mask}$ | $AP^{bbox}$ | $AP_{50}^{bbox}$ | $AP_{75}^{bbox}$ |
| scratch          | 3×     | 43.3        | 63.0             | 47.7             | 38.8        | 60.4             | 41.6             | 38.9        | 57.8             | 41.8             |
|                  | 6×     | 45.6        | 65.6             | 49.6             | 40.4        | 62.8             | 43.9             | 40.7        | 60.0             | 43.3             |
|                  | 9×     | 45.8        | 65.6             | 50.2             | 40.7        | 63.0             | 44.2             | 40.7        | 59.7             | 43.4             |
| cls-Imagenet     | 1×     | 43.8        | 65.3             | 47.9             | 39.0        | 61.6             | 42.3             | 41.4        | 61.8             | 44.1             |
|                  | 3×     | 44.3        | 64.5             | 48.6             | 39.5        | 61.7             | 42.6             | -           | -                | -                |
|                  | 6×     | 44.9        | 64.9             | 49.0             | 39.9        | 62.2             | 43.0             | -           | -                | -                |
| SEER-IG1B        | 1×     | 44.3        | 65.7             | 48.6             | 39.9        | 62.4             | 43.1             | 40.3        | 59.9             | 43.2             |
|                  | 3×     | 45.1        | 65.6             | 49.4             | 40.1        | 62.7             | 43.2             | 41.7        | 60.9             | 44.7             |
| Infomin          | 1×     | 44.8        | 65.5             | 49.0             | 40.2        | 62.5             | 43.5             | 43.0        | 62.8             | 46.4             |
|                  | 3×     | 45.6        | 65.9             | 49.9             | 40.5        | 63.2             | 43.6             | -           | -                | -                |
| cls-IG50M        | 1×     | 44.4        | 65.8             | 48.5             | 39.4        | 62.2             | 42.1             | 41.8        | 62.1             | 44.3             |
|                  | 3×     | 44.6        | 65.1             | 48.7             | 39.5        | 61.9             | 42.6             | -           | -                | -                |
| PreDet -Imagenet | 1×     | 45.8        | 66.9             | 50.2             | 40.8        | 63.6             | 43.9             | 43.1        | 63.3             | 46.4             |
| PreDet -IG50M    | 1×     | <b>47.1</b> | <b>68.2</b>      | <b>51.6</b>      | <b>41.7</b> | <b>65.2</b>      | <b>45.1</b>      | <b>45.1</b> | <b>67.8</b>      | <b>50.6</b>      |

Table 3. Results on MS-COCO for mask-RCNN and RetinaNet, with ResNeXt-101-32x8d + FPN backbone when pre-trained with different approaches. We report results upto the minimum fine-tuning schedule at which the model’s performance converges.

| pre-training     | sched. | mask-RCNN   |                  |                  |             |                  |                  |
|------------------|--------|-------------|------------------|------------------|-------------|------------------|------------------|
|                  |        | $AP^{bbox}$ | $AP_{50}^{bbox}$ | $AP_{75}^{bbox}$ | $AP^{mask}$ | $AP_{50}^{mask}$ | $AP_{75}^{mask}$ |
| scratch          | 2×     | 22.6        | 35.9             | 24.1             | 21.7        | 33.6             | 22.9             |
|                  | 3×     | 26.1        | 40.1             | 28.4             | 25.1        | 38.1             | 27.0             |
|                  | 6×     | 28.0        | 42.4             | 30.4             | 26.9        | 40.3             | 28.9             |
| cls-Imagenet     | 1×     | 24.5        | 39.2             | 26.3             | 24.3        | 37.2             | 25.9             |
|                  | 2×     | 26.1        | 40.5             | 28.3             | 25.1        | 38.2             | 27.1             |
|                  | 3×     | 25.6        | 39.6             | 27.6             | 24.8        | 37.5             | 26.2             |
| SEER-IG1B        | 1×     | 28.2        | 44.3             | 30.0             | 27.7        | 41.8             | 29.5             |
|                  | 2×     | 28.6        | 43.8             | 30.8             | 27.8        | 41.4             | 29.8             |
| Infomin          | 1×     | 25.3        | 39.6             | 27.1             | 24.7        | 37.6             | 26.5             |
|                  | 2×     | 27.3        | 41.6             | 29.6             | 26.3        | 39.4             | 28.3             |
| PreDet -ImageNet | 1×     | 26.1        | 40.7             | 27.7             | 25.6        | 38.6             | 27.3             |
| PreDet -IG50M    | 1×     | <b>30.1</b> | <b>46.7</b>      | <b>32.1</b>      | <b>29.2</b> | <b>44.2</b>      | <b>31.1</b>      |

Table 4. Results on LVIS-v1 for mask-RCNN with ResNeXt-101-32x8d + FPN backbone when pre-trained with different approaches. We report results upto the minimum fine-tuning schedule at which the model’s performance converges. Results are averaged over 3 runs for every model.

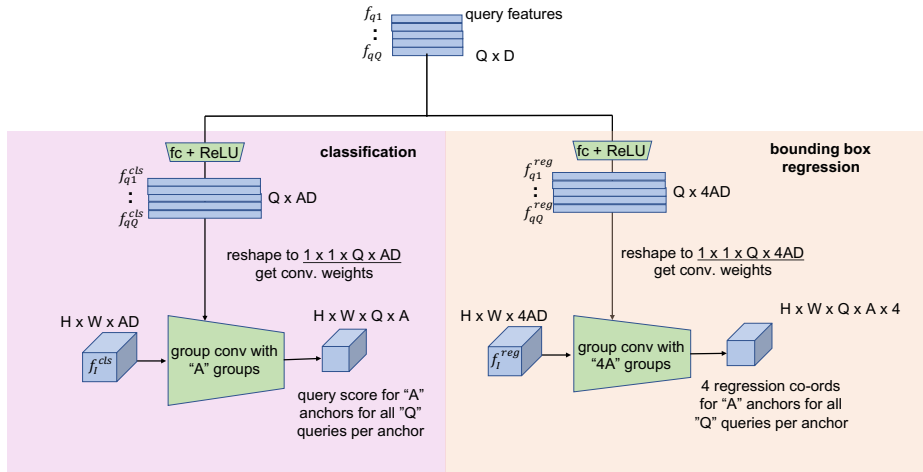

Figure 1. The classification and regression parts of the CRPN are visualized in more detail. This shows how query scores for  $A$  anchor boxes and 4 regression co-ordinates to regress these  $A$  anchor boxes to  $Q$  queries are computed for all anchors in parallel.

that the group convolutions are  $1 \times 1$  convolutions whose weights are dynamically set by the output of the FC+ReLU layers in the classification and box regression parts.
